# Supplementary material for: Fabrication of a solution-processed, highly flexible few layer MoS2(n)–CuO (p) piezotronic diode on a paper substrate for an active analog frequency modulator and enhanced broadband photodetector
Source: Royal Society of Chemistry journal article supplement (doi:10.1039/c7tc02881d), 2017-01-01
Supplement: c7tc02881d1.pdf [file c7tc02881d1.pdf]

## Supplementary information

Fabrication of solution processed, highly flexible few layer MoS<sub>2</sub> (n)-  
CuO (p) piezotronic diode on paper substrate for active analog  
frequency modulator and enhanced broadband photodetector

*Parikshit Sahatiya<sup>1</sup> and Sushmee Badhulika<sup>1\*</sup>*

*Department of Electrical Engineering, Indian Institute of Technology Hyderabad  
Hyderabad, 502285, India*

*\*Corresponding author: E-mail: sbadh@iith.ac.in; Telephone: 040-23018443 Fax 04023016032*

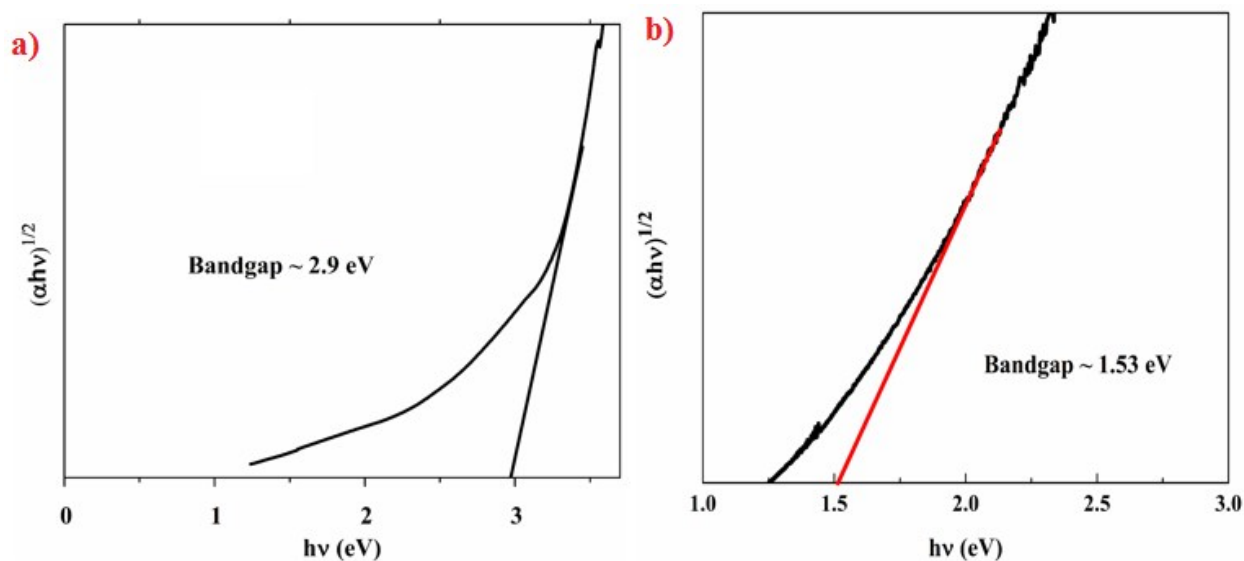

Fig S1: Tauc plot of a) CuO showing optical bandgap value of 2.9 eV b) MoS<sub>2</sub> showing optical bandgap value to be 1.53 eV

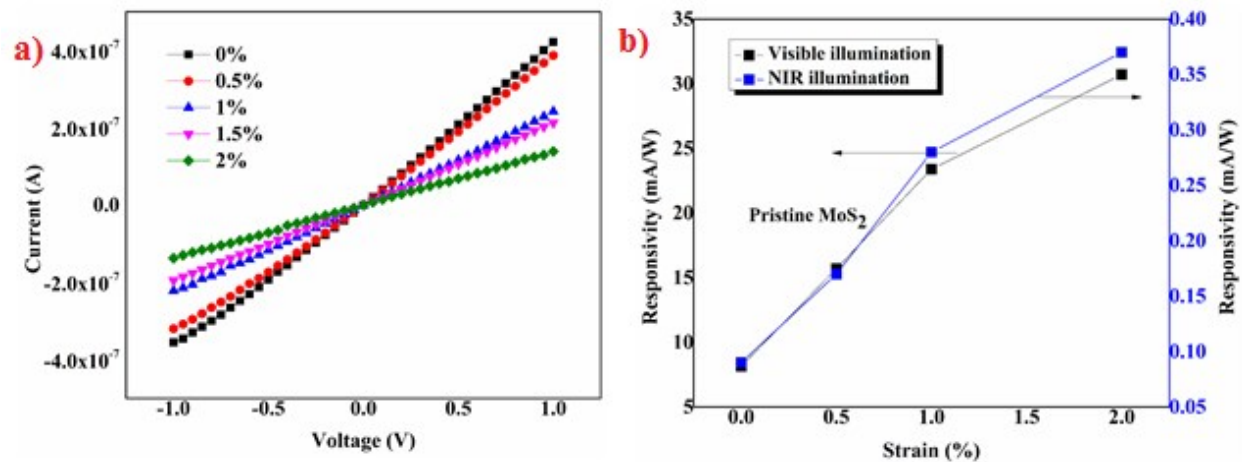

Figure S2: a) I-V characteristic of pristine MoS<sub>2</sub> under strain b) Responsivity of pristine MoS<sub>2</sub> device under visible and NIR illumination

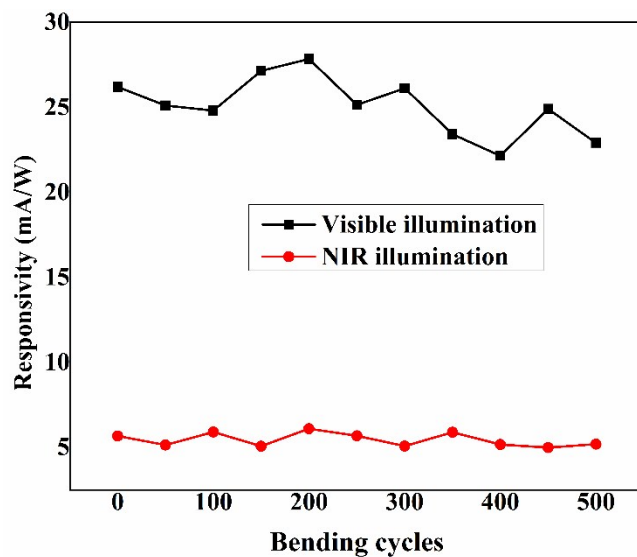

Figure S3: Graph showing the bending cycle test for MoS<sub>2</sub>/CuO piezotronic diode demonstrating negligible change in the responsivity values under both visible and NIR illumination
